# Supplementary material for: In vitro colon fermentation behaviors of Ca2+ cross-linked guluronic acid block from sodium alginate
Source: Royal Society of Chemistry journal article supplement (doi:10.1039/d4fo00934g), 2024-01-01
Supplement: d4fo00934g1.pdf [file d4fo00934g1.pdf]

***In vitro* Colon Fermentation Behaviors of Ca<sup>2+</sup> Cross-Linked  
Guluronic Acid Block from Sodium Alginate**

Dan Yuan <sup>a, b, 1</sup>, Wenqian Xiao <sup>a, b, 1</sup>, Ao Gao <sup>a, b</sup>, Wei Lu <sup>a, b</sup>, Zhiming Gao <sup>a, b</sup>,

Bing Hu<sup>c</sup>, Yuehan Wu <sup>a, b</sup>, Wenxin Jiang <sup>a, b</sup>, Yanlei Li <sup>a, b</sup>

<sup>a</sup> Cooperative Innovation Center of Industrial Fermentation (Ministry of Education & Hubei Province), Hubei University of Technology, Nanli Road, Wuhan 430068, PR China

<sup>b</sup> Glyn O. Phillips Hydrocolloid Research Centre, School of Food and Biological Engineering, Hubei University of Technology, Nanli Road, Wuhan 430068, P. R. China.

<sup>c</sup> Key Laboratory of Biotechnology and Bioresources Utilization of Ministry of Education, School of Life Sciences, Dalian Minzu University, Dalian 116600, China;

\*Corresponding author: Zhiming Gao

Tel/Fax: +86-(0)27-59750483

Email: gaozmfh@163.com

<sup>1</sup> Equal contributions.

## **Supplementary data**

**Characterization of materials:** Weight-average molecular weight ( $M_w$ ), polydispersity ( $M_w/M_n$ ), and radius of gyration ( $R_g$ ) of guluronic acid block from sodium alginate (Lot No. W201502) presented here were characterized using GPC-MALLS. Guluronic acid block length was characterized using  $^1\text{H}$  NMR, and the purity of guluronic acid was characterized using ion chromatography.

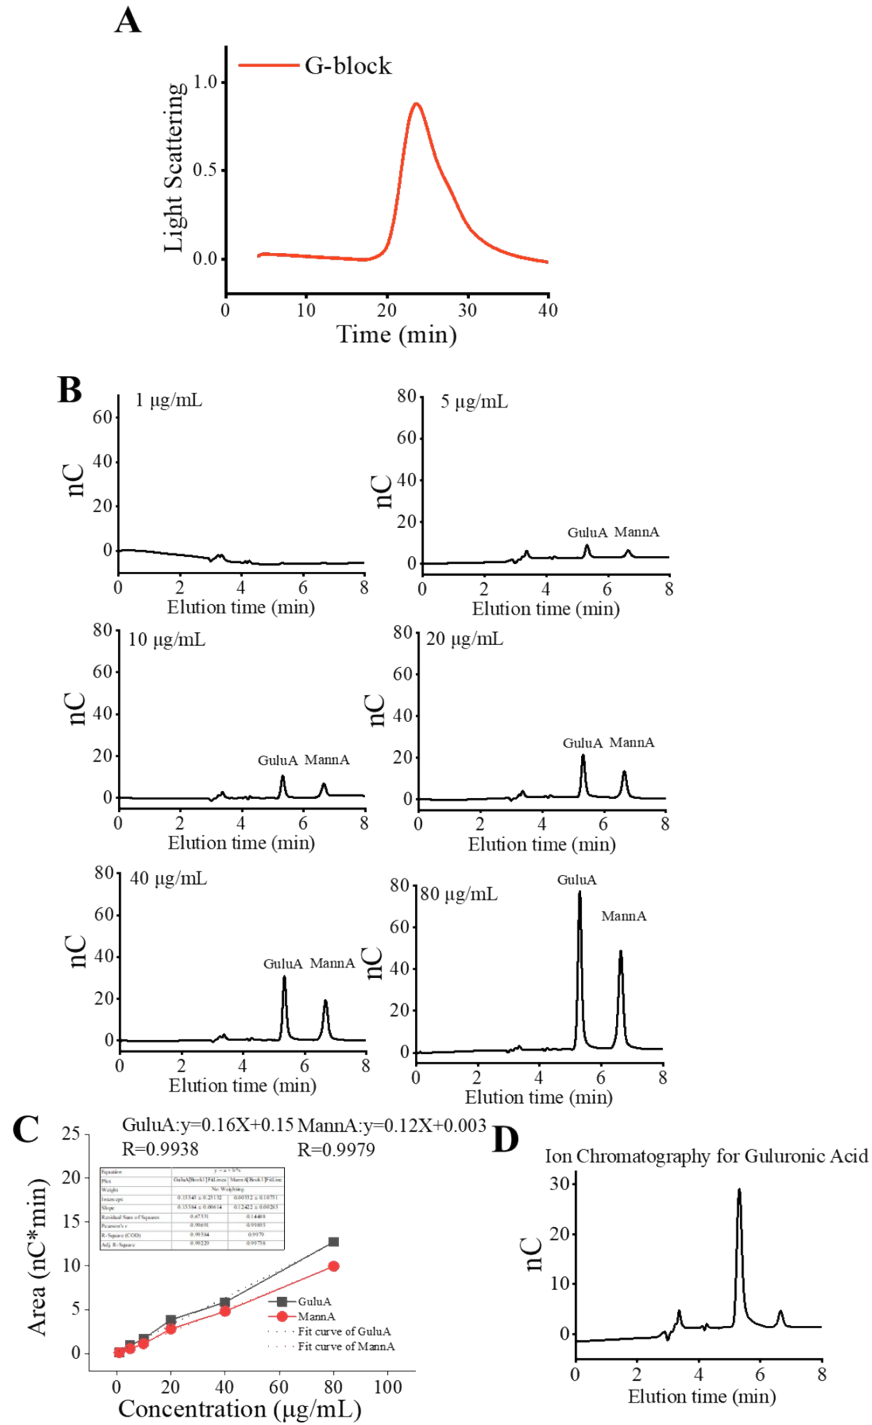

**Fig. S1.** A, GPC response curve of Guluronic acid block; B, Ion-exchange chromatograms of the guluronic and mannuronic acid standards (1, 5, 10, 20, 40, and 80  $\mu\text{g/mL}$ ); C, Fitting curves of standards; D, Ion-exchange chromatograms of guluronic acid monosaccharide from guluronic acid blocks.

**Table S1** Molecular and chemical parameters of guluronic acid block

| Sample  | Mw×10 <sup>3</sup> Da | Mw/Mn | Rg (nm) | G-length | GuluA% |
|---------|-----------------------|-------|---------|----------|--------|
| G-block | 2.281                 | 2.718 | 39.2    | 9.5      | 91.23% |

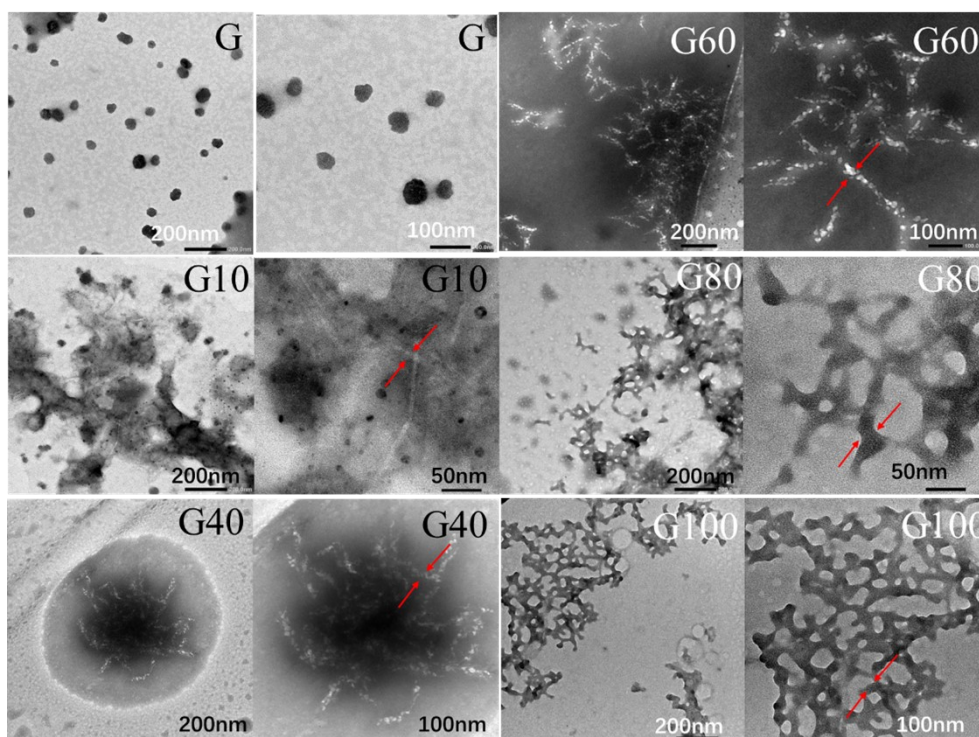

**Fig. S2.** Representative TEM photographs of GB and the cross-linked GB after *in vitro* mimic gastrointestinal digestion. G, G10, G40, G60, G80, and G100 represented the G cross-linked at calcium-ion concentrations of 0, 10, 40, 60, 80, and 100 mmol/L, respectively.

**Table S2** The composition of *in vitro* culture medium

| Class            | Compound                        | Content (/L) |
|------------------|---------------------------------|--------------|
| Nitrogen source  | Yeast extracts                  | 4.0 g        |
| Nitrogen source  | Peptone                         | 2.0 g        |
| Nitrogen source  | L-cysteine                      | 0.46 g       |
| Salts & Minerals | MgSO <sub>4</sub>               | 0.01g        |
| Salts & Minerals | NaCl                            | 0.1g         |
| Salts & Minerals | CaCl <sub>2</sub>               | 0.01g        |
| Salts & Minerals | NaHCO <sub>3</sub>              | 0.50 g       |
| Vitamins         | Vitamin k <sub>1</sub>          | 0.002 g      |
| Buffer compounds | K <sub>2</sub> HPO <sub>4</sub> | 0.04 g       |
| Buffer compounds | KH <sub>2</sub> PO <sub>4</sub> | 0.04 g       |
| Others           | Resazurin                       | 0.001 g      |
| Others           | Hemin                           | 0.02 g       |
| Others           | Bile acids                      | 0.5 g        |
| Others           | Tween 80                        | 2.0 mL       |

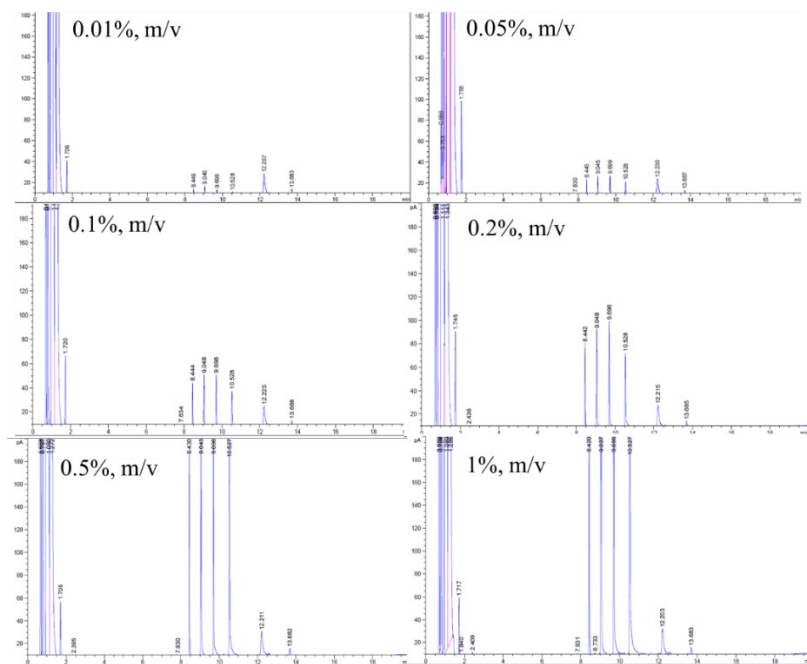

**Fig. S3** Gas chromatograms of the acetic, propionic, butyric, and valeric acid standard.

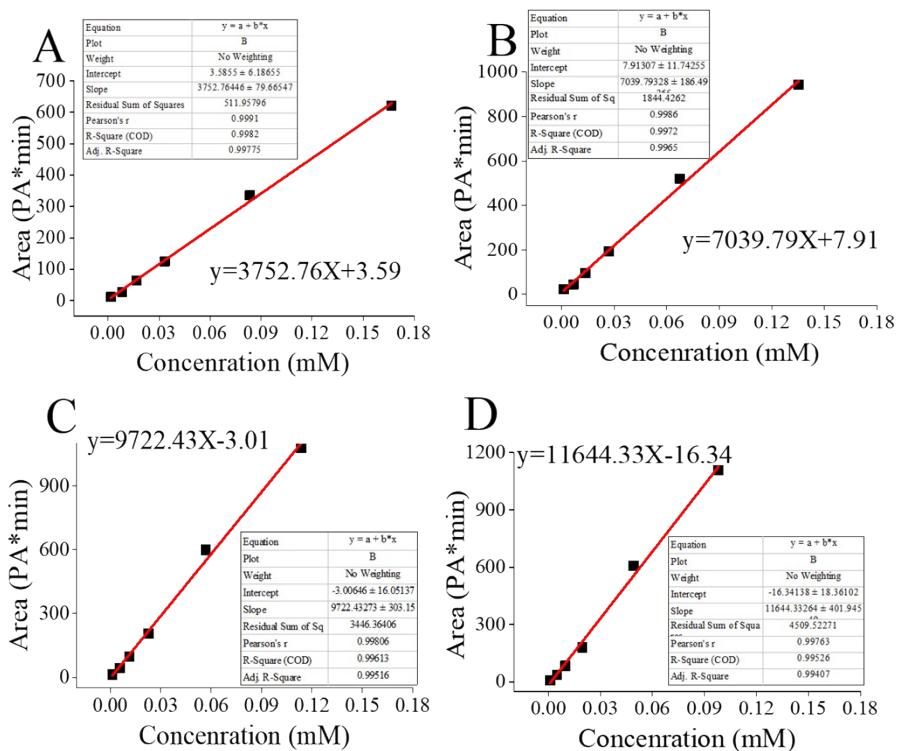

**Fig. S4.** Fitting curve of SCFA standards. A, acetic, B, propionic, C, butyric, and D, valeric acid.



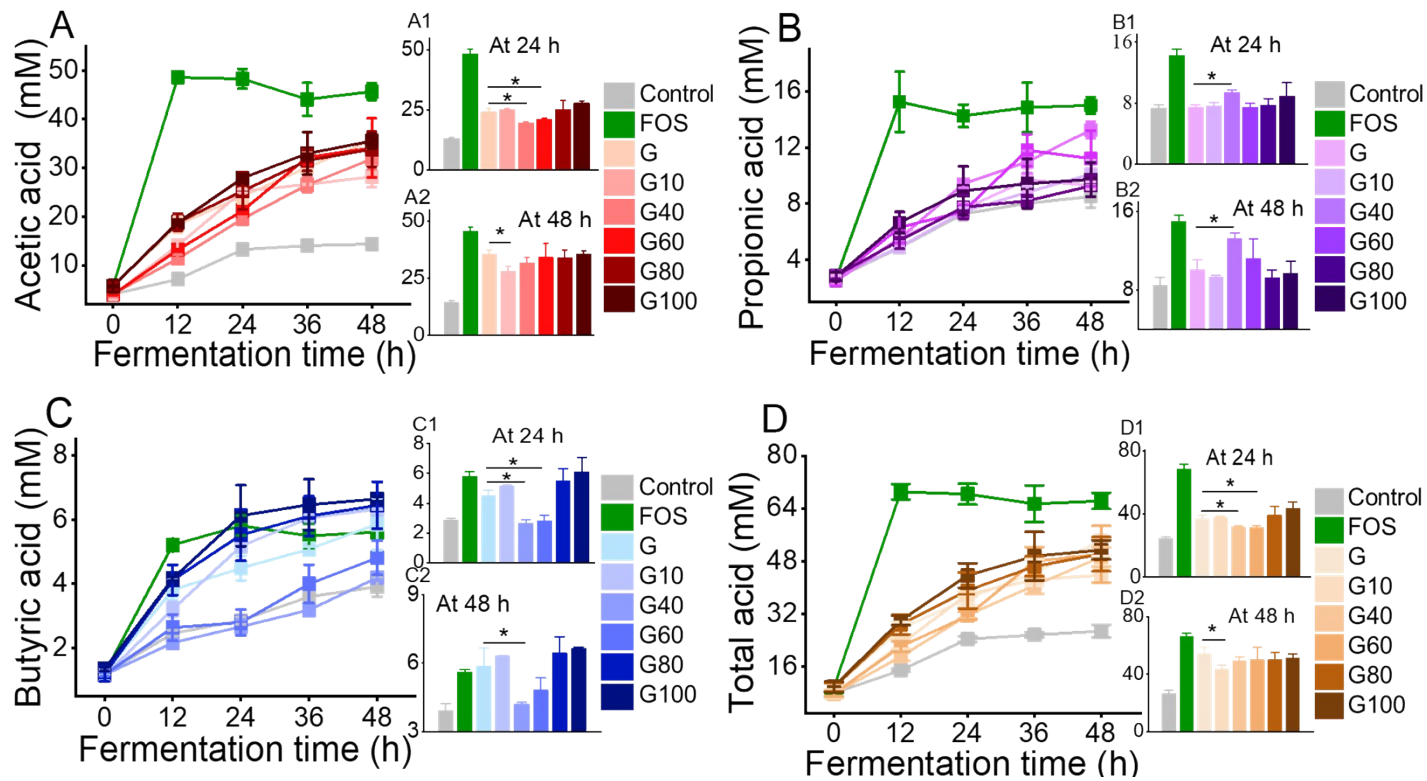

**Fig. S5.** Tendency of SCFA concentration in GB and cross-linked GB during *in vitro* fermentation.



**Table S3 Variations of Bound and Free calcium concentration in GB and cross-linked GB during *in vitro* fermentation**

| State        | Control   | FOS       | G         | G10        | G40        | G60        | G80        | G100       |
|--------------|-----------|-----------|-----------|------------|------------|------------|------------|------------|
| <b>Bound</b> |           |           |           |            |            |            |            |            |
| 0            | 1.99±0.33 | 3.09±0.33 | 2.24±0.56 | 12.84±0.56 | 17.83±0.95 | 27.31±2.23 | 13.27±0.56 | 13.91±1.16 |
| 12           | 0.14±0.51 | 0.31±0.51 | 0.92±0.22 | 12.83±1.32 | 15.47±1.02 | 27.20±0.23 | 12.43±1.32 | 12.81±1.25 |
| 24           | 0.32±0.38 | 0.11±0.38 | 0.24±0.08 | 5.37±0.88  | 8.08±0.67  | 26.16±5.15 | 5.26±0.67  | 5.55±0.48  |
| 36           | 0.45±1.08 | 0.35±1.08 | 0.15±0.05 | 2.31±0.45  | 6.68±0.98  | 5.62±0.48  | 4.17±0.88  | 4.46±0.88  |
| 48           | 0.32±0.25 | 0.42±0.25 | 0.15±0.04 | 3.34±0.14  | 2.31±0.77  | 5.30±0.45  | 2.54±0.77  | 2.20±0.14  |
| <b>Free</b>  |           |           |           |            |            |            |            |            |
| 0            | 8.55±0.33 | 9.14±0.33 | 8.38±0.56 | 12.77±1.23 | 15.45±3.76 | 20.98±6.23 | 12.45±1.76 | 11.45±2.11 |
| 12           | 8.80±0.87 | 8.78±0.51 | 8.88±0.87 | 12.08±0.96 | 19.73±3.21 | 22.13±8.23 | 12.73±2.21 | 12.35±1.74 |
| 24           | 8.63±2.26 | 8.50±0.38 | 8.99±2.26 | 14.54±1.52 | 20.27±0.52 | 22.65±0.59 | 12.27±0.52 | 13.81±0.52 |
| 36           | 8.59±1.08 | 8.56±1.08 | 8.67±0.45 | 15.51±1.33 | 25.33±0.54 | 27.30±0.62 | 18.33±0.54 | 17.33±0.54 |
| 48           | 8.91±0.25 | 8.84±0.25 | 9.70±0.26 | 18.55±1.78 | 28.33±0.24 | 36.53±1.09 | 19.33±0.24 | 19.33±0.24 |

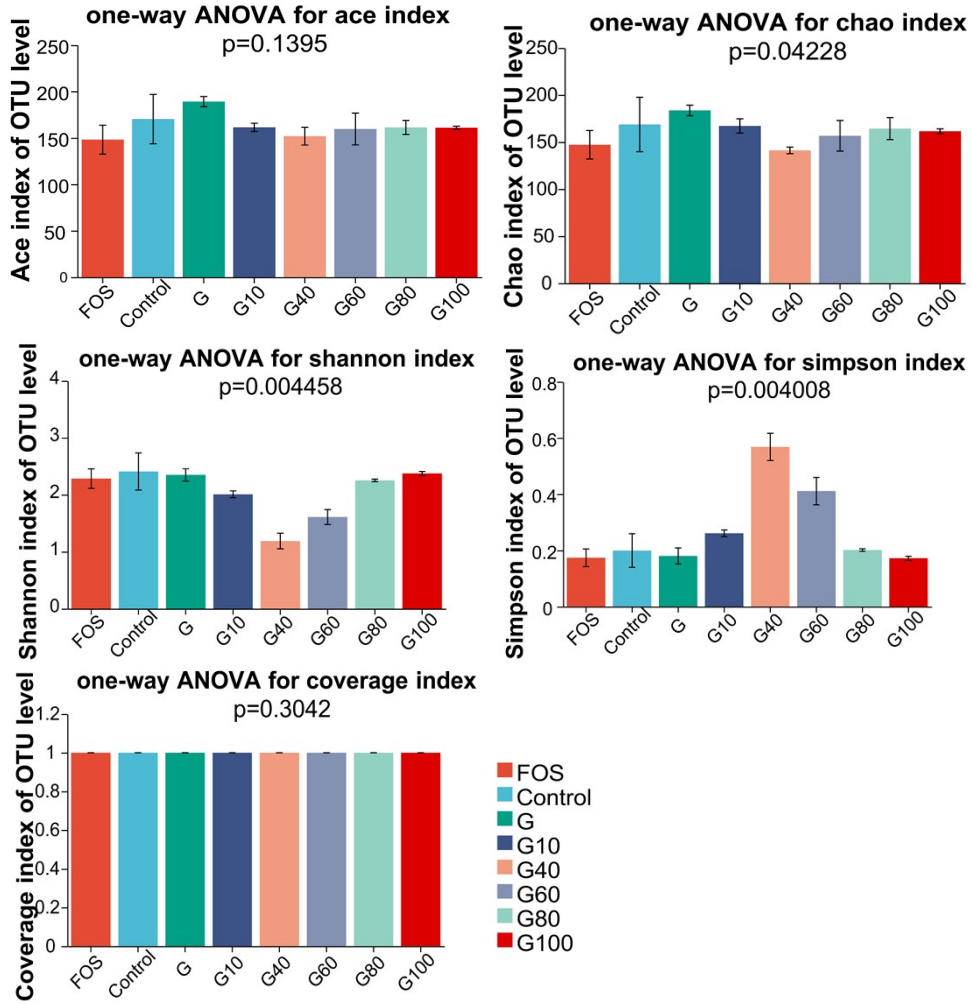

**Fig. S6.** Alpha diversity index of all groups after 36h' fermentation.

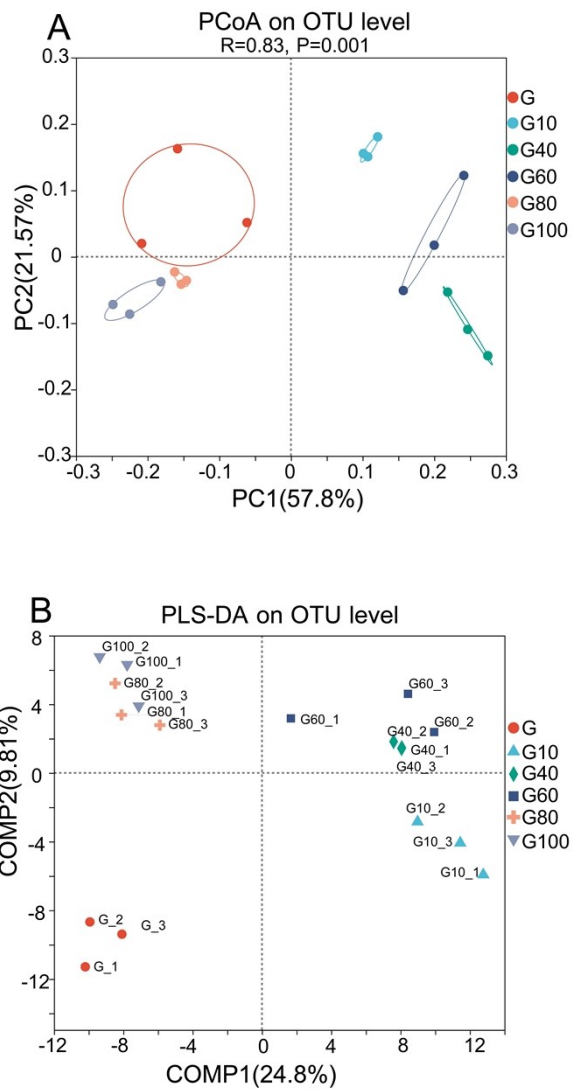

**Fig. S7.** Beta diversity index of the six experimental groups after 36 h' fermentation.

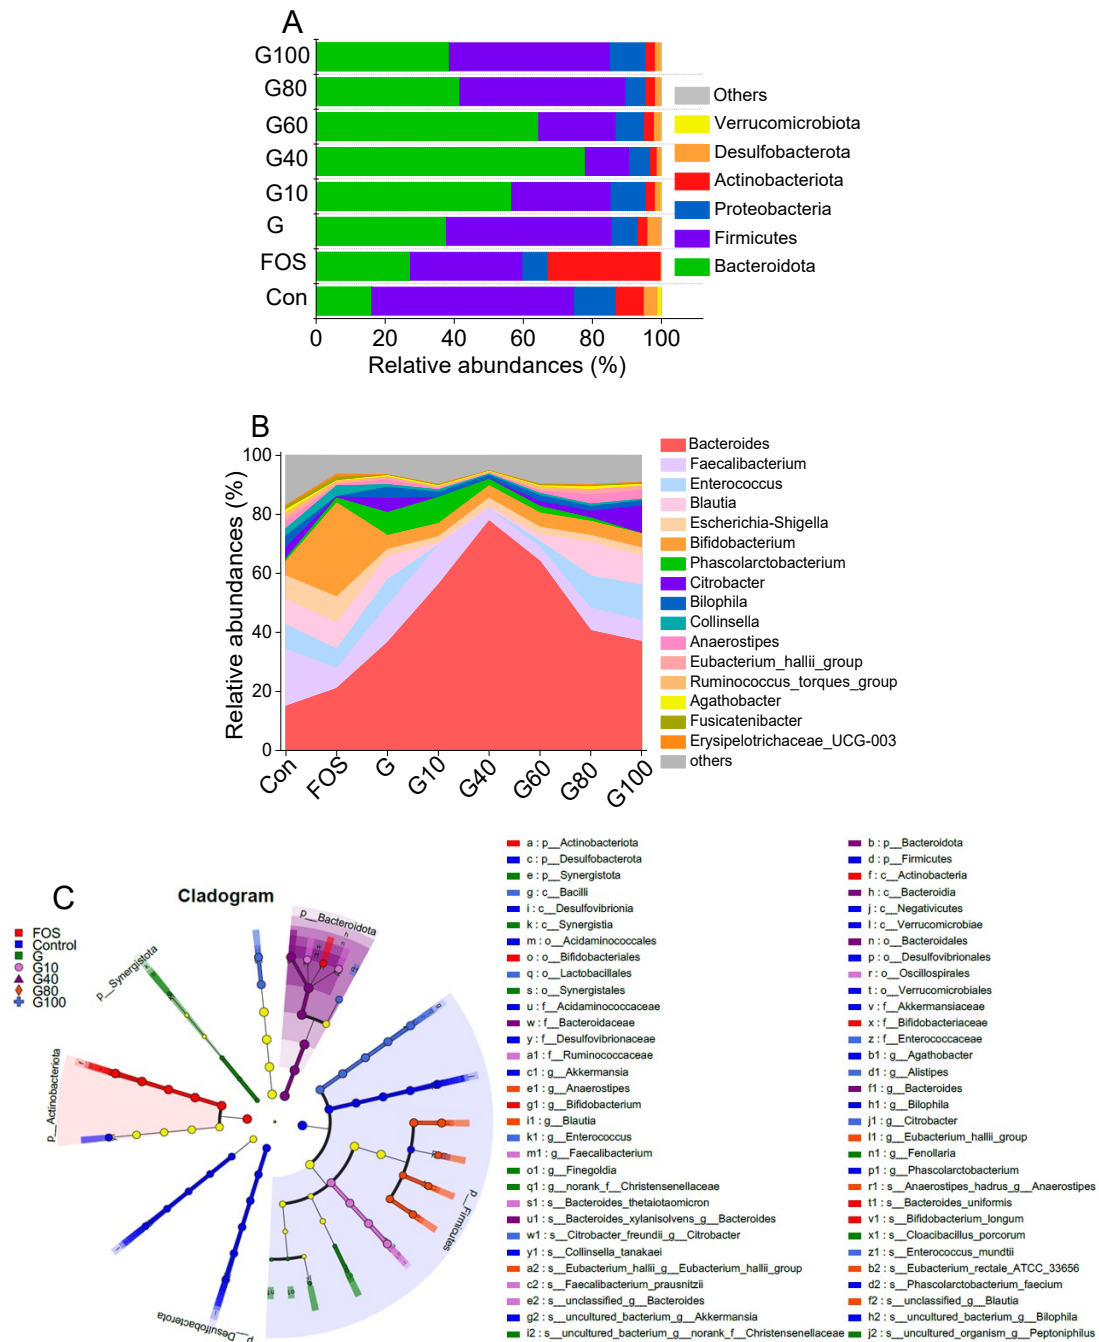

**Fig. S8** Microbial community at the phylum level after 36h' fermentation.

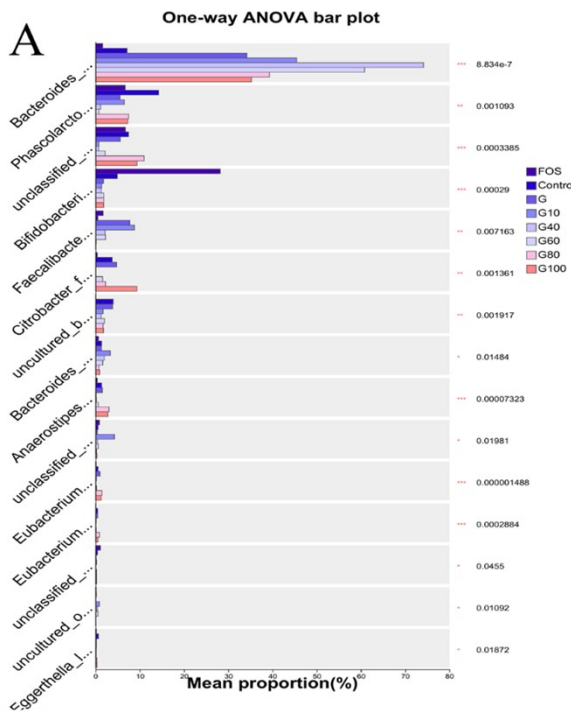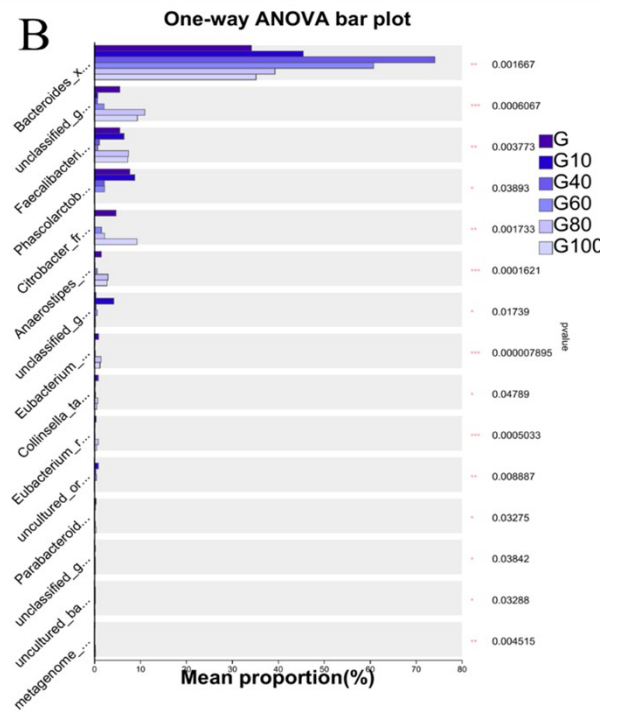

**Fig. S9.** Significance differences between (A) all groups, (B) experimental groups using one-way ANOVA test.
